# Supplementary material for: Fast sequence evolution of Hox and Hox-derived genes in the genus Drosophila
Source: PubMed Central journal article supplement (PMC1764764; doi:10.1186/1471-2148-6-106), 2006-12-12

**Additional file 3.** Genes from *D. buzzatii* (*Dbuz*), *D. melanogaster* (*Dmel*) and *D. pseudoobscura* (*Dpse*) used in the analyses with their accession number in Genbank or Flybase and their location on the chromosome. In the case of *D. buzzatii*, the original references where the sequences were first published are also supplied. The last column contains the UniProt Knowledgebase accession numbers used for annotating repetitive blocks.

| Gene symbol              | Tr <sup>a</sup> | Tr used <sup>b</sup> | Intron size <sup>c</sup> | <i>Dbuz</i>  |                  |                                 | <i>Dmel</i>  |                      | <i>Dpse</i>                                                  |                                                                                      | UniProt Knowledge base acc. |
|--------------------------|-----------------|----------------------|--------------------------|--------------|------------------|---------------------------------|--------------|----------------------|--------------------------------------------------------------|--------------------------------------------------------------------------------------|-----------------------------|
|                          |                 |                      |                          | Genbank acc. | Location         | Reference                       | Flybase acc. | Location             | Genbank acc.                                                 | Location                                                                             |                             |
| <b>Hox genes</b>         |                 |                      |                          |              |                  |                                 |              |                      |                                                              |                                                                                      |                             |
| <i>abd-A</i>             | 2               | PB                   | 17448                    | AY900631     | 2, <i>G4g</i>    | Negre et al. 2005               | FBgn0000014  | 3R, <i>89E2</i>      | AADE01000036                                                 | 2, <i>Cont1892</i>                                                                   | P29555                      |
| <i>lab</i>               | 1               | PA                   | 14389                    | AY900631     | 2, <i>G4g-5a</i> | Negre et al. 2005               | FBgn0002522  | 3R, <i>84A1</i>      | AADE01000437                                                 | 2, <i>Cont1676</i>                                                                   | P10105                      |
| <i>pb</i>                | 4               | PA                   | 30536                    | AY900632     | 2, <i>F1c</i>    | Negre et al. 2005               | FBgn0051481  | 3R, <i>84A5</i>      | AADE01000149                                                 | 2, <i>Cont1677</i>                                                                   | P31264                      |
| <b>Hox-derived genes</b> |                 |                      |                          |              |                  |                                 |              |                      |                                                              |                                                                                      |                             |
| <i>bcd</i>               | 3               | PD                   | 1126                     | AY900632     | 2, <i>F1c</i>    | Negre et al. 2005               | FBgn0000166  | 3R, <i>84A5</i>      | AADE01000149                                                 | 2, <i>Cont1677</i>                                                                   | P09081                      |
| <i>zen</i>               | 1               | PA                   | 64                       | AY900632     | 2, <i>F1c</i>    | Negre et al. 2005               | FBgn0004053  | 3R, <i>84A5</i>      | AADE01000149                                                 | 2, <i>Cont1677</i>                                                                   | P09089                      |
| <i>zen2</i>              | 1               | PA                   | 67                       | AY900632     | 2, <i>F1c</i>    | Negre et al. 2005               | FBgn0004054  | 3R, <i>84A5</i>      | AADE01000149                                                 | 2, <i>Cont1677</i>                                                                   | P09090                      |
| <b>Non-Hox genes</b>     |                 |                      |                          |              |                  |                                 |              |                      |                                                              |                                                                                      |                             |
| <i>Adhr</i>              | 1               | PA                   | 0                        | AF260699     | 3, <i>G1a</i>    | Betran and Ashburner 2000       | FBgn0000056  | 2L, <i>35B3</i>      | AADE01001152                                                 | 4, <i>Cont1559</i>                                                                   | P91615                      |
| <i>α-Est2</i>            | 1               | PA                   | 528                      | AF216210     | 2, <i>F5e-6a</i> | Robin et al. 2000               | FBgn0015570  | 3R, <i>84D9</i>      | AADE01001585                                                 | 2, <i>Cont390</i>                                                                    | Q961N0                      |
| <i>α-Est3</i>            | 1               | PA                   | 835                      | AF216211     | 2, <i>F5e-6a</i> | Robin et al. 2000               | FBgn0015571  | 3R, <i>84D9</i>      | AADE01001585                                                 | 2, <i>Cont390</i>                                                                    | Q8SZW5                      |
| <i>Ccp3 – Ccp84Ac</i>    | 1               | PA                   | 64                       | AY900631     | 2, <i>G4g</i>    | Negre et al. 2005               | FBgn0004781  | 3R, <i>84A3--4</i>   | AADE01000149                                                 | 2, <i>Cont1677</i>                                                                   | O97060                      |
| <i>Ccp6 – Ccp84Ae</i>    | 1               | PA                   | 118                      | AY900631     | 2, <i>G4g</i>    | Negre et al. 2005               | FBgn0004779  | 3R, <i>84A3</i>      | AADE01000437                                                 | 2, <i>Cont1676</i>                                                                   | O97062                      |
| <i>Ccp7 – Ccp84Af</i>    | 1               | PA                   | 58                       | AY900631     | 2, <i>G4g</i>    | Negre et al. 2005               | FBgn0004778  | 3R, <i>84A3</i>      | AADE01000437                                                 | 2, <i>Cont1676</i>                                                                   | O97063                      |
| <i>Ccp8 – Ccp84Ag</i>    | 1               | PA                   | 215                      | AY900631     | 2, <i>G4g</i>    | Negre et al. 2005               | FBgn0004777  | 3R, <i>84A2</i>      | AADE01000437                                                 | 2, <i>Cont1676</i>                                                                   | O97064                      |
| <i>CG1288</i>            | 1               | PA                   | 55                       | AY900632     | 2, <i>F1c</i>    | Negre et al. 2005               | FBgn0037484  | 3R, <i>84D2</i>      | AADE01000014                                                 | 2, <i>Cont268</i>                                                                    | Q9VI77                      |
| <i>CG13617</i>           | 1               | PA                   | 229                      | AY551073     | 2, <i>E4g-5a</i> | Puig, Caceres, and Ruiz 2004    | FBgn0039201  | 3R, <i>96A5</i>      | AADE01000267                                                 | 2, <i>Cont3813</i>                                                                   | Q9VC70                      |
| <i>CG14290</i>           | 1               | PB                   | 509                      | AY900632     | 2, <i>F1c</i>    | Negre et al. 2005               | FBgn0038662  | 3R, <i>91D5</i>      | AADE01000175                                                 | 4, <i>Cont2631</i>                                                                   | Q7KSC4                      |
| <i>CG14609</i>           | 1               | PA                   | 400                      | AY900632     | 2, <i>F1c</i>    | Negre et al. 2005               | FBgn0037483  | 3R, <i>84D2</i>      | AADE01000014                                                 | 2, <i>Cont268</i>                                                                    | Q8T3W3                      |
| <i>CG14899</i>           | 1               | PA                   | 140                      | AY900632     | 2, <i>F1c</i>    | Negre et al. 2005               | FBgn0038438  | 3R, <i>89B18</i>     | AADE01000429                                                 | 2, <i>Cont2827</i>                                                                   | Q9VEU2                      |
| <i>CG17836</i>           | 4               | PA                   | 5563                     | AY900632     | 2, <i>F1c</i>    | Negre et al. 2005               | FBgn0038661  | 3R, <i>91D4--5</i>   | AADE01000175<br>AADE01000328                                 | 4, <i>Cont2631</i><br>4, <i>Cont3752</i>                                             | Q9VE23                      |
| <i>CG2520</i>            | 1               | PA                   | 9607                     | AY900632     | 2, <i>F1c</i>    | Negre et al. 2005               | FBgn0026210  | 3R, <i>84D1--2</i>   | AADE01000014                                                 | 2, <i>Cont268</i>                                                                    | Q9VI75                      |
| <i>CG31363</i>           | 4               | PE                   | 12711                    | AY900631     | 2, <i>G4g</i>    | Negre et al. 2005               | FBgn0051363  | 3R, <i>86E11--13</i> | AADE01002495<br>AADE01000322<br>AADE01006966<br>AADE01000546 | 2, <i>Cont1082</i><br>2, <i>Cont2641</i><br>2, <i>Cont5794</i><br>2, <i>Cont1019</i> | Q9VGL6                      |
| <i>Lsp1β</i>             | 1               | PA                   | 68                       | AY561258     | 2, <i>D3c</i>    | Gonzalez, Casals, and Ruiz 2004 | FBgn0002563  | 2L, <i>21E2</i>      | AADE01000478                                                 | 4, <i>Cont3520</i>                                                                   | Q6Q431                      |
| <i>Lsp1γ</i>             | 1               | PA                   | 65                       | AY561259     | 3, <i>C2g</i>    | Gonzalez, Casals, and Ruiz 2004 | FBgn0002564  | 3L, <i>61A6</i>      | AADE01000061                                                 | 4, <i>Cont1620</i>                                                                   | Q6Q429                      |

<sup>a</sup> Number of transcripts that exist in all the three species.

<sup>b</sup> The longest transcript shared by all the three species and that was used for the analyses.

<sup>c</sup> Total intron size in base pairs (sum of all introns in the gene, including those outside the limits of the coding sequence, in *D. melanogaster*).

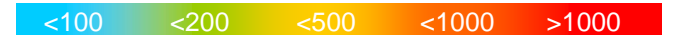

Supplement: 1471-2148-6-106-S3.pdf [file 1471-2148-6-106-S3.pdf]
