# Supplementary material for: Fast sequence evolution of Hox and Hox-derived genes in the genus Drosophila
Source: PubMed Central journal article supplement (PMC1764764; doi:10.1186/1471-2148-6-106), 2006-12-12
Supplement: 1471-2148-6-106-S1.pdf [file 1471-2148-6-106-S1.pdf]

**Additional file 1.** Parameters of gene structure, base composition and nucleotide evolution for each gene.

| Gene                      | Specie      | Gene length <sup>a</sup> | Protein length <sup>b</sup> | C. Bias <sup>c</sup><br>N <sub>c</sub> | G+C content measures <sup>d</sup> |               |               | <i>t</i>       | <i>d<sub>N</sub></i> | <i>d<sub>S</sub></i> | κ              | ω              |
|---------------------------|-------------|--------------------------|-----------------------------|----------------------------------------|-----------------------------------|---------------|---------------|----------------|----------------------|----------------------|----------------|----------------|
|                           |             |                          |                             |                                        | GC                                | GC2           | GC3           |                |                      |                      |                |                |
| <b>Hox genes</b>          |             |                          |                             |                                        |                                   |               |               |                |                      |                      |                |                |
| <i>abd-A</i>              | <i>Dbuz</i> | 20665                    | 536                         | 51.16                                  | 0.5815                            | 0.4795        | 0.6493        | 1.82426        | 0.09071              | 2.46771              | 1.66636        | 0.03676        |
|                           | <i>Dmel</i> | 18315                    | 590                         | 49.63                                  | 0.6006                            | 0.4915        | 0.7080        |                |                      |                      |                |                |
|                           | <i>Dpse</i> | 18244                    | 568                         | 38.13                                  | 0.6450                            | 0.4947        | 0.8145        |                |                      |                      |                |                |
|                           | <b>Avg</b>  | <b>19074.7</b>           | <b>564.7</b>                | <b>46.31</b>                           | <b>0.6090</b>                     | <b>0.4886</b> | <b>0.7240</b> |                |                      |                      |                |                |
| <i>lab</i>                | <i>Dbuz</i> | 21166                    | 659                         | 52.98                                  | 0.5544                            | 0.4355        | 0.5799        | 2.80665        | 0.24208              | 3.28391              | 1.66998        | 0.07372        |
|                           | <i>Dmel</i> | 16276                    | 629                         | 41.98                                  | 0.6078                            | 0.4674        | 0.7368        |                |                      |                      |                |                |
|                           | <i>Dpse</i> | 15388                    | 691                         | 48.00                                  | 0.5808                            | 0.4443        | 0.6642        |                |                      |                      |                |                |
|                           | <b>Avg</b>  | <b>17610.0</b>           | <b>659.7</b>                | <b>47.65</b>                           | <b>0.5810</b>                     | <b>0.4491</b> | <b>0.6603</b> |                |                      |                      |                |                |
| <i>pb</i>                 | <i>Dbuz</i> | 34287                    | 763                         | 53.81                                  | 0.5343                            | 0.4404        | 0.5670        | 1.69659        | 0.14613              | 2.02037              | 1.39885        | 0.07233        |
|                           | <i>Dmel</i> | 31889                    | 782                         | 50.90                                  | 0.5631                            | 0.4348        | 0.6554        |                |                      |                      |                |                |
|                           | <i>Dpse</i> | 32676                    | 801                         | 50.00                                  | 0.5589                            | 0.4444        | 0.6087        |                |                      |                      |                |                |
|                           | <b>Avg</b>  | <b>32950.7</b>           | <b>782.0</b>                | <b>51.57</b>                           | <b>0.5521</b>                     | <b>0.4399</b> | <b>0.6104</b> |                |                      |                      |                |                |
| <b>Hox genes:</b>         | <i>Dbuz</i> | 25372.7                  | 652.7                       | 52.65                                  | 0.5567                            | 0.4518        | 0.5988        | <b>2.10917</b> | <b>0.15964</b>       | <b>2.59066</b>       | <b>1.57840</b> | <b>0.06094</b> |
|                           | <i>Dmel</i> | 22160.0                  | 667.0                       | 47.50                                  | 0.5905                            | 0.4646        | 0.7000        |                |                      |                      |                |                |
|                           | <i>Dpse</i> | 22102.7                  | 686.7                       | 45.38                                  | 0.5949                            | 0.4611        | 0.6958        |                |                      |                      |                |                |
|                           | <b>Avg</b>  | <b>23211.8</b>           | <b>668.8</b>                | <b>48.51</b>                           | <b>0.5807</b>                     | <b>0.4592</b> | <b>0.6649</b> |                |                      |                      |                |                |
| <b>Hox-derived genes</b>  |             |                          |                             |                                        |                                   |               |               |                |                      |                      |                |                |
| <i>bcd</i>                | <i>Dbuz</i> | 2385                     | 542                         | 52.41                                  | 0.5387                            | 0.4428        | 0.5532        | 2.37143        | 0.21122              | 2.47837              | 1.70016        | 0.08523        |
|                           | <i>Dmel</i> | 2593                     | 489                         | 49.76                                  | 0.5828                            | 0.4540        | 0.6624        |                |                      |                      |                |                |
|                           | <i>Dpse</i> | 1829                     | 536                         | 48.35                                  | 0.5777                            | 0.4366        | 0.6245        |                |                      |                      |                |                |
|                           | <b>Avg</b>  | <b>2269.0</b>            | <b>522.3</b>                | <b>50.17</b>                           | <b>0.5664</b>                     | <b>0.4444</b> | <b>0.6134</b> |                |                      |                      |                |                |
| <i>zen</i>                | <i>Dbuz</i> | 1057                     | 331                         | 44.79                                  | 0.5498                            | 0.4441        | 0.6384        | 2.47931        | 0.27517              | 2.74878              | 1.33133        | 0.10011        |
|                           | <i>Dmel</i> | 1123                     | 353                         | 48.56                                  | 0.5420                            | 0.4448        | 0.6499        |                |                      |                      |                |                |
|                           | <i>Dpse</i> | 1198                     | 378                         | 48.76                                  | 0.5785                            | 0.4815        | 0.6458        |                |                      |                      |                |                |
|                           | <b>Avg</b>  | <b>1126.0</b>            | <b>354.0</b>                | <b>47.37</b>                           | <b>0.5568</b>                     | <b>0.4568</b> | <b>0.6447</b> |                |                      |                      |                |                |
| <i>zen2</i>               | <i>Dbuz</i> | 958                      | 297                         | 57.00                                  | 0.4478                            | 0.4074        | 0.4134        | 6.73935        | 0.69501              | 7.60078              | 0.93934        | 0.09144        |
|                           | <i>Dmel</i> | 823                      | 252                         | 59.77                                  | 0.4563                            | 0.3810        | 0.4669        |                |                      |                      |                |                |
|                           | <i>Dpse</i> | 880                      | 270                         | 56.94                                  | 0.4951                            | 0.3889        | 0.5625        |                |                      |                      |                |                |
|                           | <b>Avg</b>  | <b>887.0</b>             | <b>273.0</b>                | <b>57.91</b>                           | <b>0.4664</b>                     | <b>0.3924</b> | <b>0.4810</b> |                |                      |                      |                |                |
| <b>Hox-derived genes:</b> | <i>Dbuz</i> | 1466.7                   | 390.0                       | 51.40                                  | 0.5121                            | 0.4314        | 0.5350        | <b>3.86336</b> | <b>0.39380</b>       | <b>4.27598</b>       | <b>1.32361</b> | <b>0.09226</b> |
|                           | <i>Dmel</i> | 1513.0                   | 364.7                       | 52.69                                  | 0.5271                            | 0.4266        | 0.5931        |                |                      |                      |                |                |
|                           | <i>Dpse</i> | 1302.3                   | 394.7                       | 51.35                                  | 0.5504                            | 0.4356        | 0.6109        |                |                      |                      |                |                |
|                           | <b>Avg</b>  | <b>1427.3</b>            | <b>383.1</b>                | <b>51.82</b>                           | <b>0.5299</b>                     | <b>0.4312</b> | <b>0.5797</b> |                |                      |                      |                |                |

| Gene                 | Specie      | Gene length <sup>a</sup> | Protein length <sup>b</sup> | C. Bias <sup>c</sup><br>N <sub>c</sub> | G+C content measures <sup>d</sup> |               |               | <i>t</i> | <i>d<sub>N</sub></i> | <i>d<sub>S</sub></i> | κ       | ω       |
|----------------------|-------------|--------------------------|-----------------------------|----------------------------------------|-----------------------------------|---------------|---------------|----------|----------------------|----------------------|---------|---------|
|                      |             |                          |                             |                                        | GC                                | GC2           | GC3           |          |                      |                      |         |         |
| <b>Non-Hox genes</b> |             |                          |                             |                                        |                                   |               |               |          |                      |                      |         |         |
| <i>Adhr</i>          | <i>Dbuz</i> | 939                      | 274                         | 45.14                                  | 0.5535                            | 0.3650        | 0.7422        | 2.49544  | 0.10802              | 3.61777              | 0.95355 | 0.02986 |
|                      | <i>Dmel</i> | 1293                     | 272                         | 59.09                                  | 0.4792                            | 0.3750        | 0.5333        |          |                      |                      |         |         |
|                      | <i>Dpse</i> | 1200                     | 278                         | 45.14                                  | 0.5396                            | 0.3885        | 0.6667        |          |                      |                      |         |         |
|                      | <b>Avg</b>  | <b>1144.0</b>            | <b>274.7</b>                | <b>49.79</b>                           | <b>0.5241</b>                     | <b>0.3761</b> | <b>0.6474</b> |          |                      |                      |         |         |
| <i>α-Est2</i>        | <i>Dbuz</i> | 1991                     | 565                         | 46.22                                  | 0.5558                            | 0.4071        | 0.6904        | 3.72951  | 0.25409              | 4.94931              | 1.23819 | 0.05134 |
|                      | <i>Dmel</i> | 2226                     | 566                         | 56.00                                  | 0.5106                            | 0.3710        | 0.5885        |          |                      |                      |         |         |
|                      | <i>Dpse</i> | 1978                     | 566                         | 45.14                                  | 0.5648                            | 0.3799        | 0.7234        |          |                      |                      |         |         |
|                      | <b>Avg</b>  | <b>2065.0</b>            | <b>565.7</b>                | <b>49.12</b>                           | <b>0.5437</b>                     | <b>0.3860</b> | <b>0.6674</b> |          |                      |                      |         |         |
| <i>α-Est3</i>        | <i>Dbuz</i> | 1820                     | 541                         | 47.73                                  | 0.5471                            | 0.4011        | 0.6842        | 3.40410  | 0.25436              | 4.38895              | 1.14458 | 0.05796 |
|                      | <i>Dmel</i> | 2154                     | 543                         | 50.73                                  | 0.5476                            | 0.3831        | 0.6647        |          |                      |                      |         |         |
|                      | <i>Dpse</i> | 1808                     | 543                         | 44.83                                  | 0.5641                            | 0.3923        | 0.6783        |          |                      |                      |         |         |
|                      | <b>Avg</b>  | <b>1927.3</b>            | <b>542.3</b>                | <b>47.76</b>                           | <b>0.5529</b>                     | <b>0.3921</b> | <b>0.6757</b> |          |                      |                      |         |         |
| <i>Ccp84Ac</i>       | <i>Dbuz</i> | 701                      | 215                         | 50.81                                  | 0.5705                            | 0.3907        | 0.6168        | 5.11649  | 0.18095              | 6.70225              | 1.38891 | 0.02700 |
|                      | <i>Dmel</i> | 715                      | 217                         | 39.06                                  | 0.6129                            | 0.3917        | 0.7083        |          |                      |                      |         |         |
|                      | <i>Dpse</i> | 783                      | 231                         | 35.67                                  | 0.6075                            | 0.4026        | 0.6870        |          |                      |                      |         |         |
|                      | <b>Avg</b>  | <b>733.0</b>             | <b>221.0</b>                | <b>41.85</b>                           | <b>0.5970</b>                     | <b>0.3950</b> | <b>0.6707</b> |          |                      |                      |         |         |
| <i>Ccp84Ae</i>       | <i>Dbuz</i> | 647                      | 195                         | 45.63                                  | 0.5932                            | 0.5026        | 0.5361        | 3.87698  | 0.16555              | 3.67507              | 1.16139 | 0.04505 |
|                      | <i>Dmel</i> | 742                      | 208                         | 38.71                                  | 0.6346                            | 0.5144        | 0.6618        |          |                      |                      |         |         |
|                      | <i>Dpse</i> | 722                      | 217                         | 43.55                                  | 0.6175                            | 0.5161        | 0.6435        |          |                      |                      |         |         |
|                      | <b>Avg</b>  | <b>703.7</b>             | <b>206.7</b>                | <b>42.63</b>                           | <b>0.6151</b>                     | <b>0.5110</b> | <b>0.6138</b> |          |                      |                      |         |         |
| <i>Ccp84Af</i>       | <i>Dbuz</i> | 491                      | 145                         | 36.71                                  | 0.6092                            | 0.4000        | 0.6875        | 1.98417  | 0.09926              | 2.44754              | 1.68720 | 0.04055 |
|                      | <i>Dmel</i> | 511                      | 151                         | 35.28                                  | 0.6225                            | 0.3907        | 0.7667        |          |                      |                      |         |         |
|                      | <i>Dpse</i> | 512                      | 151                         | 40.76                                  | 0.6093                            | 0.3775        | 0.6933        |          |                      |                      |         |         |
|                      | <b>Avg</b>  | <b>504.7</b>             | <b>149.0</b>                | <b>37.59</b>                           | <b>0.6137</b>                     | <b>0.3894</b> | <b>0.7158</b> |          |                      |                      |         |         |
| <i>Ccp84Ag</i>       | <i>Dbuz</i> | 573                      | 162                         | 44.07                                  | 0.6173                            | 0.4938        | 0.6584        | 1.28347  | 0.04913              | 1.42169              | 2.41924 | 0.03455 |
|                      | <i>Dmel</i> | 788                      | 191                         | 35.13                                  | 0.6754                            | 0.5393        | 0.7526        |          |                      |                      |         |         |
|                      | <i>Dpse</i> | 690                      | 198                         | 40.37                                  | 0.6364                            | 0.5404        | 0.6244        |          |                      |                      |         |         |
|                      | <b>Avg</b>  | <b>683.7</b>             | <b>183.7</b>                | <b>39.86</b>                           | <b>0.6430</b>                     | <b>0.5245</b> | <b>0.6785</b> |          |                      |                      |         |         |
| <i>CG13617</i>       | <i>Dbuz</i> | 2401                     | 734                         | 54.38                                  | 0.5050                            | 0.3828        | 0.5461        | 4.45418  | 0.38303              | 5.12077              | 1.80499 | 0.07480 |
|                      | <i>Dmel</i> | 2440                     | 737                         | 50.56                                  | 0.5364                            | 0.3894        | 0.6335        |          |                      |                      |         |         |
|                      | <i>Dpse</i> | 2420                     | 745                         | 50.60                                  | 0.5427                            | 0.3933        | 0.6598        |          |                      |                      |         |         |
|                      | <b>Avg</b>  | <b>2420.3</b>            | <b>738.7</b>                | <b>51.85</b>                           | <b>0.5280</b>                     | <b>0.3885</b> | <b>0.6131</b> |          |                      |                      |         |         |
| <i>CG14290</i>       | <i>Dbuz</i> | 587                      | 108                         | 81.73                                  | 0.5278                            | 0.5370        | 0.5960        | 4.24639  | 0.17265              | 6.25148              | 0.67744 | 0.02762 |
|                      | <i>Dmel</i> | 756                      | 107                         | 56.68                                  | 0.5483                            | 0.4766        | 0.6939        |          |                      |                      |         |         |
|                      | <i>Dpse</i> | 640                      | 107                         | 52.11                                  | 0.5701                            | 0.4673        | 0.7347        |          |                      |                      |         |         |
|                      | <b>Avg</b>  | <b>661.0</b>             | <b>107.3</b>                | <b>63.51</b>                           | <b>0.5487</b>                     | <b>0.4936</b> | <b>0.6748</b> |          |                      |                      |         |         |

| Gene                  | Specie      | Gene length <sup>a</sup> | Protein length <sup>b</sup> | C. Bias <sup>c</sup><br>N <sub>c</sub> | G+C content measures <sup>d</sup> |               |               | <i>t</i> | <i>d<sub>N</sub></i> | <i>d<sub>S</sub></i> | κ       | ω       |
|-----------------------|-------------|--------------------------|-----------------------------|----------------------------------------|-----------------------------------|---------------|---------------|----------|----------------------|----------------------|---------|---------|
|                       |             |                          |                             |                                        | GC                                | GC2           | GC3           |          |                      |                      |         |         |
| CG14609               | <i>Dbuz</i> | 2603                     | 599                         | 51.51                                  | 0.4802                            | 0.2838        | 0.5930        | 5.31870  | 0.21768              | 7.00844              | 1.87039 | 0.03106 |
|                       | <i>Dmel</i> | 2191                     | 597                         | 55.15                                  | 0.4662                            | 0.2714        | 0.5986        |          |                      |                      |         |         |
|                       | <i>Dpse</i> | 2126                     | 594                         | 51.29                                  | 0.4703                            | 0.2677        | 0.5904        |          |                      |                      |         |         |
|                       | <b>Avg</b>  | <b>2306.7</b>            | <b>596.7</b>                | <b>52.65</b>                           | <b>0.4722</b>                     | <b>0.2743</b> | <b>0.5940</b> |          |                      |                      |         |         |
| CG14899               | <i>Dbuz</i> | 1023                     | 258                         | 52.22                                  | 0.4974                            | 0.3721        | 0.5667        | 2.17723  | 0.08058              | 2.54854              | 1.71101 | 0.03162 |
|                       | <i>Dmel</i> | 923                      | 261                         | 46.42                                  | 0.5504                            | 0.3831        | 0.6911        |          |                      |                      |         |         |
|                       | <i>Dpse</i> | 982                      | 258                         | 46.08                                  | 0.5413                            | 0.3915        | 0.6502        |          |                      |                      |         |         |
|                       | <b>Avg</b>  | <b>976.0</b>             | <b>259.0</b>                | <b>48.24</b>                           | <b>0.5297</b>                     | <b>0.3822</b> | <b>0.6360</b> |          |                      |                      |         |         |
| CG2520                | <i>Dbuz</i> | 14173                    | 477                         | 50.22                                  | 0.5059                            | 0.4465        | 0.5098        | 0.91112  | 0.02653              | 1.04662              | 2.03996 | 0.02535 |
|                       | <i>Dmel</i> | 11011                    | 468                         | 56.50                                  | 0.5228                            | 0.4423        | 0.5588        |          |                      |                      |         |         |
|                       | <i>Dpse</i> | 11681                    | 473                         | 56.62                                  | 0.5159                            | 0.4440        | 0.5439        |          |                      |                      |         |         |
|                       | <b>Avg</b>  | <b>12288.3</b>           | <b>472.7</b>                | <b>54.45</b>                           | <b>0.5149</b>                     | <b>0.4443</b> | <b>0.5375</b> |          |                      |                      |         |         |
| CG31363               | <i>Dbuz</i> | 8491                     | 203                         | 57.49                                  | 0.4663                            | 0.4877        | 0.4192        | 1.95356  | 0.15912              | 2.32116              | 1.30436 | 0.06855 |
|                       | <i>Dmel</i> | 13033                    | 208                         | 41.71                                  | 0.5833                            | 0.4904        | 0.7376        |          |                      |                      |         |         |
|                       | <i>Dpse</i> | 12208                    | 227                         | 45.20                                  | 0.5786                            | 0.5066        | 0.7227        |          |                      |                      |         |         |
|                       | <b>Avg</b>  | <b>11244.0</b>           | <b>212.7</b>                | <b>48.13</b>                           | <b>0.5427</b>                     | <b>0.4949</b> | <b>0.6265</b> |          |                      |                      |         |         |
| <i>Lsp1β</i>          | <i>Dbuz</i> | 2427                     | 788                         | 39.80                                  | 0.4820                            | 0.2605        | 0.7236        | 1.18839  | 0.09959              | 2.69820              | 1.62088 | 0.03691 |
|                       | <i>Dmel</i> | 2435                     | 789                         | 27.24                                  | 0.5560                            | 0.2763        | 0.9260        |          |                      |                      |         |         |
|                       | <i>Dpse</i> | 2432                     | 787                         | 28.45                                  | 0.5417                            | 0.2630        | 0.8873        |          |                      |                      |         |         |
|                       | <b>Avg</b>  | <b>2431.3</b>            | <b>788.0</b>                | <b>31.83</b>                           | <b>0.5266</b>                     | <b>0.2666</b> | <b>0.8456</b> |          |                      |                      |         |         |
| <i>Lsp1γ</i>          | <i>Dbuz</i> | 2376                     | 773                         | 38.94                                  | 0.4981                            | 0.2717        | 0.7348        | 1.53426  | 0.11973              | 2.90247              | 1.41796 | 0.04125 |
|                       | <i>Dmel</i> | 2381                     | 772                         | 41.20                                  | 0.4965                            | 0.2642        | 0.7480        |          |                      |                      |         |         |
|                       | <i>Dpse</i> | 2383                     | 773                         | 29.41                                  | 0.5395                            | 0.2600        | 0.8804        |          |                      |                      |         |         |
|                       | <b>Avg</b>  | <b>2380.0</b>            | <b>772.7</b>                | <b>36.52</b>                           | <b>0.5113</b>                     | <b>0.2653</b> | <b>0.7877</b> |          |                      |                      |         |         |
| <i>Non-Hox genes:</i> | <i>Dbuz</i> | 2749.5                   | 402.5                       | 49.51                                  | 0.5340                            | 0.4002        | 0.6203        | 2.91160  | 0.15802              | 3.80668              | 1.49600 | 0.04156 |
|                       | <i>Dmel</i> | 2906.6                   | 405.8                       | 45.96                                  | 0.5562                            | 0.3973        | 0.6842        |          |                      |                      |         |         |
|                       | <i>Dpse</i> | 2837.7                   | 409.9                       | 43.68                                  | 0.5626                            | 0.3994        | 0.6924        |          |                      |                      |         |         |
|                       | <b>Avg</b>  | <b>2831.3</b>            | <b>406.0</b>                | <b>46.38</b>                           | <b>0.5509</b>                     | <b>0.3989</b> | <b>0.6656</b> |          |                      |                      |         |         |
| <b>ALL CLASSES:</b>   | <i>Dbuz</i> | 5798.1                   | 436.4                       | 50.23                                  | 0.5341                            | 0.4120        | 0.6050        | 2.96138  | 0.23715              | 3.55777              | 1.46600 | 0.06492 |
|                       | <i>Dmel</i> | 5458.0                   | 437.2                       | 47.15                                  | 0.5569                            | 0.4111        | 0.6735        |          |                      |                      |         |         |
|                       | <i>Dpse</i> | 5370.5                   | 447.2                       | 45.02                                  | 0.5655                            | 0.4134        | 0.6812        |          |                      |                      |         |         |
|                       | <b>Avg</b>  | <b>5542.2</b>            | <b>440.3</b>                | <b>47.46</b>                           | <b>0.5522</b>                     | <b>0.4121</b> | <b>0.6532</b> |          |                      |                      |         |         |

<sup>a</sup> Gene length (in base pairs), excluding 5' and 3' UTRs (includes exons and introns only from the 'start' to the 'stop' codons in the CDS)

<sup>b</sup> Protein length (in amino acids)

<sup>c</sup> Codon Bias measure: *Effective Number of Codons* (Wright 1990)

<sup>d</sup> G+C content measures: percentage of G+C at all coding positions (GC), second coding positions (GC2) and third coding positions (GC3)
