# Supplementary material for: Fast sequence evolution of Hox and Hox-derived genes in the genus Drosophila
Source: PubMed Central journal article supplement (PMC1764764; doi:10.1186/1471-2148-6-106), 2006-12-12
Supplement: 1471-2148-6-106-S4.pdf [file 1471-2148-6-106-S4.pdf]

## **Additional file 4:**

This file contains Tables 1, 2 and 3 of the main text, obtained according to three different annotation criteria to define repetitive sequences (see *Methods* in the main text):

- **Annotation criterion 1 = Uniprot**
  
- **Annotation criterion 2 = Uniprot + Simple repeats** (note that this is the annotation criterion selected for the main text; tables in this section are those shown in the main text)
  
- **Annotation criterion 3 = Uniprot + Simple repeats + Complex repeats**

## ANNOTATION CRITERION 1 = Uniprot

**Table 1.** Mean nucleotide substitution parameters, ANOVAs and contrast tests for the three groups of genes.

|                                                                |                     | $t$     | $d_N$   | $d_S$   | $\omega$ |                       |
|----------------------------------------------------------------|---------------------|---------|---------|---------|----------|-----------------------|
| Complete coding sequences                                      | <i>Hox</i>          | 2.10917 | 0.15964 | 2.59066 | 0.06094  | *<br>***              |
|                                                                | <i>Hox</i> -derived | 3.86337 | 0.39380 | 4.27598 | 0.09226  |                       |
|                                                                | Non- <i>Hox</i>     | 2.91160 | 0.15802 | 3.80668 | 0.04156  |                       |
|                                                                | ANOVA               | n.s.    | *       | n.s.    | ***      |                       |
| Coding sequences excluding the homeobox                        | <i>Hox</i>          | 2.27653 | 0.18257 | 2.65921 | 0.06673  | **<br>***<br>*<br>*** |
|                                                                | <i>Hox</i> -derived | 5.04914 | 0.54809 | 5.26666 | 0.11320  |                       |
|                                                                | Non- <i>Hox</i>     | 2.91160 | 0.15802 | 3.80668 | 0.04156  |                       |
|                                                                | ANOVA               | n.s.    | **      | n.s.    | ***      |                       |
| Coding sequences excluding repetitive regions                  | <i>Hox</i>          | 1.88711 | 0.13826 | 2.36833 | 0.05917  | *<br>***<br>***       |
|                                                                | <i>Hox</i> -derived | 3.80869 | 0.39291 | 4.21256 | 0.09423  |                       |
|                                                                | Non- <i>Hox</i>     | 2.91375 | 0.15726 | 3.81781 | 0.04071  |                       |
|                                                                | ANOVA               | n.s.    | *       | n.s.    | ***      |                       |
| Coding sequences excluding the homeobox and repetitive regions | <i>Hox</i>          | 2.01610 | 0.16274 | 2.35658 | 0.06782  | **<br>***<br>***      |
|                                                                | <i>Hox</i> -derived | 4.99467 | 0.54854 | 5.20047 | 0.11617  |                       |
|                                                                | Non- <i>Hox</i>     | 2.91375 | 0.15726 | 3.81781 | 0.04071  |                       |
|                                                                | ANOVA               | n.s.    | **      | n.s.    | ***      |                       |

n.s. (P>0.05), \* (P<0.05), \*\* (P<0.01), \*\*\* (P<0.001). For pairwise comparisons, only significant values are shown. Contrast tests assume homogeneity of variances where the Levene test does not give a significant P value.

**Table 2.** Percentage of amino acid differences in the alignment ( $\pm$ SD) in the three groups of proteins.

|                    | <b>TOTAL</b>      | <b>UNIQUE</b>     | <b>REPETITIVE</b> | <b>T-test<sup>§</sup></b> |
|--------------------|-------------------|-------------------|-------------------|---------------------------|
| <i>Hox</i>         | 22.80 $\pm$ 10.44 | 19.88 $\pm$ 10.84 | 33.94 $\pm$ 11.71 |                           |
| <i>Hox-derived</i> | 40.43 $\pm$ 18.26 | 40.17 $\pm$ 18.52 | 33.93             | **                        |
| <i>Non-Hox</i>     | 23.77 $\pm$ 10.81 | 23.66 $\pm$ 11.02 | 13.51             |                           |
| <b>ANOVA</b>       | n.s.              | n.s.              | n.s.              |                           |

n.s. (P>0.05), \* (P<0.05), \*\* (P<0.01), \*\*\* (P<0.001)

<sup>§</sup> T-test for paired samples (unique vs. repetitive) on proteins having both types of regions [ABD-A, LAB, PB, BCD and LAP (product of *CG2520*)].

**Table 3.** Percentage of indels in the alignment ( $\pm$ SD) in the three groups of proteins.

|                    | <b>TOTAL</b>     | <b>UNIQUE</b>     | <b>REPETITIVE</b> | <b>T-test<sup>§</sup></b> |
|--------------------|------------------|-------------------|-------------------|---------------------------|
| <i>Hox</i>         | 25.77 $\pm$ 4.31 | 21.61 $\pm$ 6.67  | 35.97 $\pm$ 5.52  |                           |
| <i>Hox-derived</i> | 37.53 $\pm$ 9.63 | 35.36 $\pm$ 12.80 | 60.61             | *                         |
| <i>Non-Hox</i>     | 8.73 $\pm$ 10.24 | 8.50 $\pm$ 10.34  | 20.88             |                           |
| <b>ANOVA</b>       | ***              | **                | n.s.              |                           |

n.s. (P>0.05), \* (P<0.05), \*\* (P<0.01), \*\*\* (P<0.001)

<sup>§</sup> T-test for paired samples (unique vs. repetitive) on proteins having both types of regions [ABD-A, LAB, PB, BCD and LAP (product of *CG2520*)].

## ANNOTATION CRITERION 2 = Uniprot + Simple repeats

Note that this is the annotation criterion selected for the main text (tables in this section are those shown in the main text).

**Table 1.** Mean nucleotide substitution parameters, ANOVAs and contrast tests for the three groups of genes.

|                                                                |                     | $t$     | $d_N$   | $d_S$   | $\omega$ |                       |
|----------------------------------------------------------------|---------------------|---------|---------|---------|----------|-----------------------|
| Complete coding sequences                                      | <i>Hox</i>          | 2.10917 | 0.15964 | 2.59066 | 0.06094  | *<br>***              |
|                                                                | <i>Hox</i> -derived | 3.86336 | 0.39380 | 4.27598 | 0.09226  |                       |
|                                                                | Non- <i>Hox</i>     | 2.91160 | 0.15802 | 3.80668 | 0.04156  |                       |
|                                                                | ANOVA               | n.s.    | *       | n.s.    | ***      |                       |
| Coding sequences excluding the homeobox                        | <i>Hox</i>          | 2.27653 | 0.18257 | 2.65921 | 0.06673  | **<br>***<br>*<br>*** |
|                                                                | <i>Hox</i> -derived | 5.04914 | 0.54809 | 5.26666 | 0.11320  |                       |
|                                                                | Non- <i>Hox</i>     | 2.91160 | 0.15802 | 3.80668 | 0.04156  |                       |
|                                                                | ANOVA               | n.s.    | **      | n.s.    | ***      |                       |
| Coding sequences excluding repetitive regions                  | <i>Hox</i>          | 1.81997 | 0.12399 | 2.35029 | 0.05310  | *<br>*<br>***         |
|                                                                | <i>Hox</i> -derived | 3.71981 | 0.37759 | 4.14242 | 0.09042  |                       |
|                                                                | Non- <i>Hox</i>     | 2.85593 | 0.15444 | 3.76458 | 0.04035  |                       |
|                                                                | ANOVA               | n.s.    | *       | n.s.    | ***      |                       |
| Coding sequences excluding the homeobox and repetitive regions | <i>Hox</i>          | 1.94286 | 0.14684 | 2.33783 | 0.06146  | **<br>***             |
|                                                                | <i>Hox</i> -derived | 4.88928 | 0.53011 | 5.12014 | 0.11245  |                       |
|                                                                | Non- <i>Hox</i>     | 2.85593 | 0.15444 | 3.76458 | 0.04035  |                       |
|                                                                | ANOVA               | n.s.    | **      | n.s.    | ***      |                       |

n.s. (P>0.05), \* (P<0.05), \*\* (P<0.01), \*\*\* (P<0.001). For pairwise comparisons, only significant values are shown. Contrast tests assume homogeneity of variances where the Levene test does not give a significant P value.

**Table 2.** Percentage of amino acid differences in the alignment ( $\pm$ SD) in the three groups of proteins.

|                    | TOTAL             | UNIQUE            | REPETITIVE        | T-test <sup>§</sup> |
|--------------------|-------------------|-------------------|-------------------|---------------------|
| <i>Hox</i>         | 22.80 $\pm$ 10.44 | 18.22 $\pm$ 10.50 | 37.11 $\pm$ 12.33 |                     |
| <i>Hox-derived</i> | 40.43 $\pm$ 18.26 | 39.00 $\pm$ 19.64 | 62.97 $\pm$ 24.08 | ***                 |
| <i>Non-Hox</i>     | 23.77 $\pm$ 10.81 | 23.38 $\pm$ 10.93 | 55.46 $\pm$ 31.35 |                     |
| <b>ANOVA</b>       | n.s.              | n.s.              | n.s.              |                     |

n.s. (P>0.05), \* (P<0.05), \*\* (P<0.01), \*\*\* (P<0.001)

<sup>§</sup> T-test for paired samples (unique vs. repetitive) on proteins having both types of regions [ABD-A, LAB, PB, BCD, ZEN, Ccp84Ac, CG13617, CG14290 and LAP (product of CG2520)].

**Table 3.** Percentage of indels in the alignment ( $\pm$ SD) in the three groups of proteins.

|                    | TOTAL            | UNIQUE            | REPETITIVE        | T-test <sup>§</sup> |
|--------------------|------------------|-------------------|-------------------|---------------------|
| <i>Hox</i>         | 25.77 $\pm$ 4.31 | 16.21 $\pm$ 8.40  | 44.82 $\pm$ 2.38  |                     |
| <i>Hox-derived</i> | 37.53 $\pm$ 9.63 | 34.88 $\pm$ 12.40 | 75.64 $\pm$ 34.45 | **                  |
| <i>Non-Hox</i>     | 8.73 $\pm$ 10.24 | 8.46 $\pm$ 10.28  | 23.79 $\pm$ 25.66 |                     |
| <b>ANOVA</b>       | ***              | **                | n.s.              |                     |

n.s. (P>0.05), \* (P<0.05), \*\* (P<0.01), \*\*\* (P<0.001)

<sup>§</sup> T-test for paired samples (unique vs. repetitive) on proteins having both types of regions [ABD-A, LAB, PB, BCD, ZEN, Ccp84Ac, CG13617, CG14290 and LAP (product of CG2520)].

## ANNOTATION CRITERION 3 = Uniprot + Simple repeats + Complex repeats

**Table 1.** Mean nucleotide substitution parameters, ANOVAs and contrast tests for the three groups of genes.

|                                                                |                     | $t$     | $d_N$   | $d_S$   | $\omega$ |           |
|----------------------------------------------------------------|---------------------|---------|---------|---------|----------|-----------|
| Complete coding sequences                                      | <i>Hox</i>          | 2.10917 | 0.15964 | 2.59066 | 0.06094  | *<br>***  |
|                                                                | <i>Hox</i> -derived | 3.86337 | 0.39380 | 4.27598 | 0.09226  |           |
|                                                                | Non- <i>Hox</i>     | 2.91160 | 0.15802 | 3.80668 | 0.04156  |           |
|                                                                | ANOVA               | n.s.    | *       | n.s.    | ***      |           |
| Coding sequences excluding the homeobox                        | <i>Hox</i>          | 2.27653 | 0.18257 | 2.65921 | 0.06673  | **<br>*** |
|                                                                | <i>Hox</i> -derived | 5.04914 | 0.54809 | 5.26666 | 0.11320  |           |
|                                                                | Non- <i>Hox</i>     | 2.91160 | 0.15802 | 3.80668 | 0.04156  |           |
|                                                                | ANOVA               | n.s.    | **      | n.s.    | ***      |           |
| Coding sequences excluding repetitive regions                  | <i>Hox</i>          | 1.47343 | 0.08116 | 2.09576 | 0.03615  | *<br>**   |
|                                                                | <i>Hox</i> -derived | 3.57569 | 0.33831 | 4.17038 | 0.07474  |           |
|                                                                | Non- <i>Hox</i>     | 2.69427 | 0.14241 | 3.72116 | 0.03739  |           |
|                                                                | ANOVA               | n.s.    | n.s.    | n.s.    | *        |           |
| Coding sequences excluding the homeobox and repetitive regions | <i>Hox</i>          | 1.52473 | 0.09941 | 2.00530 | 0.04554  | **<br>*** |
|                                                                | <i>Hox</i> -derived | 4.70398 | 0.48080 | 5.11828 | 0.09217  |           |
|                                                                | Non- <i>Hox</i>     | 2.69427 | 0.14241 | 3.72116 | 0.03739  |           |
|                                                                | ANOVA               | n.s.    | *       | n.s.    | **       |           |

n.s. (P>0.05), \* (P<0.05), \*\* (P<0.01), \*\*\* (P<0.001). For pairwise comparisons, only significant values are shown. Contrast tests assume homogeneity of variances where the Levene test does not give a significant P value.

**Table 2.** Percentage of amino acid differences in the alignment ( $\pm$ SD) in the three groups of proteins.

|                    | TOTAL             | UNIQUE            | REPETITIVE        | T-test <sup>§</sup> |
|--------------------|-------------------|-------------------|-------------------|---------------------|
| <i>Hox</i>         | 22.80 $\pm$ 10.44 | 13.64 $\pm$ 11.65 | 37.00 $\pm$ 10.69 |                     |
| <i>Hox-derived</i> | 40.43 $\pm$ 18.26 | 35.87 $\pm$ 22.13 | 57.50 $\pm$ 9.77  | **                  |
| <i>Non-Hox</i>     | 23.77 $\pm$ 10.81 | 21.75 $\pm$ 11.57 | 34.16 $\pm$ 31.78 |                     |
| <b>ANOVA</b>       | n.s.              | n.s.              | n.s.              |                     |

n.s. (P>0.05), \* (P<0.05), \*\* (P<0.01), \*\*\* (P<0.001)

<sup>§</sup> T-test for paired samples (unique vs. repetitive) on proteins having both types of regions [ABD-A, LAB, PB, BCD, ZEN, Ccp84Ac, Ccp84Ae, Ccp84Af, Ccp84Ag, CG13617, CG14290, LAP (product of *CG2520*) and CG31363].

**Table 3.** Percentage of indels in the alignment ( $\pm$ SD) in the three groups of proteins.

|                    | TOTAL            | UNIQUE            | REPETITIVE        | T-test <sup>§</sup> |
|--------------------|------------------|-------------------|-------------------|---------------------|
| <i>Hox</i>         | 25.77 $\pm$ 4.31 | 9.72 $\pm$ 5.29   | 43.60 $\pm$ 6.39  |                     |
| <i>Hox-derived</i> | 37.53 $\pm$ 9.63 | 27.78 $\pm$ 17.38 | 66.43 $\pm$ 7.83  | ***                 |
| <i>Non-Hox</i>     | 8.73 $\pm$ 10.24 | 3.45 $\pm$ 5.29   | 23.41 $\pm$ 20.84 |                     |
| <b>ANOVA</b>       | ***              | ***               | *                 |                     |

n.s. (P>0.05), \* (P<0.05), \*\* (P<0.01), \*\*\* (P<0.001)

<sup>§</sup> T-test for paired samples (unique vs. repetitive) on proteins having both types of regions [ABD-A, LAB, PB, BCD, ZEN, Ccp84Ac, Ccp84Ae, Ccp84Af, Ccp84Ag, CG13617, CG14290, LAP (product of *CG2520*) and CG31363].
